# Supplementary material for: Criteria for Reporting the Development and Evaluation of Complex Interventions in healthcare: revised guideline (CReDECI 2)
Source: Trials. 2015 May 3;16:204. doi: 10.1186/s13063-015-0709-y (PMC4461976; doi:10.1186/s13063-015-0709-y)
Supplement: Additional file 1: — Changes from the original CReDECI to the revised CReDECI 2 criteria list. [file 13063_2015_709_MOESM1_ESM.pdf]

**Additional file 1 – Changes from the original CReDECI to the revised CReDECI 2 criteria list**

| <b>Original CReDECI [7]</b>                                                                                                                                          | <b>CReDECI 2</b>                                                                                                                   |
|----------------------------------------------------------------------------------------------------------------------------------------------------------------------|------------------------------------------------------------------------------------------------------------------------------------|
| <b><i>First stage - Development</i></b>                                                                                                                              | <b><i>First stage - Development</i></b>                                                                                            |
| 1. Description of the intervention's underlying theoretical considerations                                                                                           | 1. Description of the intervention's underlying theoretical basis                                                                  |
| 2. Description of all components of the intervention                                                                                                                 | 2. Description of all intervention components, including the reasons for their selection as well as their aims/essential functions |
| 3. Rationale for the selection of the intervention's components                                                                                                      |                                                                                                                                    |
| 5. Rationale for the aim/essential functions of the intervention's components, including the evidence whether the components are appropriate for achieving this goal |                                                                                                                                    |
| 4. Illustration of any intended interactions between different components                                                                                            | 3. Illustration of any intended interactions between different components                                                          |
| 6. Consideration of contextual factors and determinants of the setting in the modelling of the intervention                                                          | 4. Description and consideration of the context's characteristics in intervention modelling                                        |
| <b><i>Second stage - Feasibility and piloting</i></b>                                                                                                                | <b><i>Second stage - Feasibility and piloting</i></b>                                                                              |
| 7. Information on pilot-testing                                                                                                                                      | 5. Description of the pilot-test and its impact on the definite intervention                                                       |
| 8. In case of pilot-test: Presentation of all relevant results and their impact on the modelling of the final intervention                                           |                                                                                                                                    |
| <b>Third stage - Introduction of the intervention and evaluation</b>                                                                                                 | <b>Third stage - Evaluation</b>                                                                                                    |
| 9. Description of the control intervention (comparator)                                                                                                              | 6. Description of the control condition (comparator) and reasons for the selection                                                 |
| 10. If the study was conducted in different clusters or centres: Description of a standardised implementation strategy throughout the centres                        | 7. Description of the strategy for delivering the intervention within the study context                                            |
| 11. Description of all materials/ tools used for                                                                                                                     | 8. Description of all materials or tools used                                                                                      |

|                                                                                                                                                 |                                                                                                                                                                                     |
|-------------------------------------------------------------------------------------------------------------------------------------------------|-------------------------------------------------------------------------------------------------------------------------------------------------------------------------------------|
| the implementation of the intervention to allow a replication of the study                                                                      | for the delivery of the intervention                                                                                                                                                |
| 13. Description of any deviation from the study protocol during the implementation process                                                      | 9. Description of fidelity of the delivery process compared to the study protocol                                                                                                   |
| 12. Description of an evaluation of the implementation process                                                                                  | 10. Description of a process evaluation and its underlying theoretical basis                                                                                                        |
| 14. Description of facilitators or barriers revealed by the process evaluation which have influenced the interventions' implementation          | 11. Description of internal facilitators and barriers potentially influencing the delivery of the intervention as revealed by the process evaluation                                |
|                                                                                                                                                 | 12. Description of external conditions or factors occurring during the study which might have influenced the delivery of the intervention and/or mode of action (i.e. how it works) |
| 15. Description of unexpected interactions between components of the intervention and the environment in which the intervention was implemented | -                                                                                                                                                                                   |
| 16. Description of costs or required resources for the intervention's implementation                                                            | 13. Description of costs or required resources for the delivery of the intervention                                                                                                 |
